# Supplementary material for: Guidelines for the Surgical Management of Laryngeal Cancer: Korean Society of Thyroid-Head and Neck Surgery
Source: PubMed Central journal article supplement — Clin Exp Otorhinolaryngol. 2017 Jan 3;10(1):1–43. doi: 10.21053/ceo.2016.01389 (PMC5327593; doi:10.21053/ceo.2016.01389), 2017-01-03
Supplement: ceo-2016-01389-s002.pdf [file ceo-2016-01389-s002.pdf]

Supplementary Table 2. List of references which used to induce recommendations

| Recommendation | Key reference                                                       | Study design                                                       | No. of patients                                                     |
|----------------|---------------------------------------------------------------------|--------------------------------------------------------------------|---------------------------------------------------------------------|
| 1              | 1, 2                                                                | RCT                                                                | 332, 518                                                            |
| 2A             | (-)                                                                 | (-)                                                                | NA                                                                  |
| 2B             | 10                                                                  | Expert opinion                                                     | NA                                                                  |
| 2C             | 14                                                                  | Case series                                                        | 248                                                                 |
| 3              | 15, 18, 19, 20, 21, 22, 23, 27, 29, 32, 33, 35<br>30                | Case series<br>Systematic review                                   | 140, 95, 40, 41, 44, 40, 34, 11, 172, 26, 53, 149<br>4 Studies, 203 |
| 4              | 41, 42, 43, 46                                                      | Systematic review,<br>meta-analysis                                | NA                                                                  |
| 5              | 50<br>51, 53                                                        | Expert opinion<br>Case series                                      | NA<br>25, 30                                                        |
| 6A             | 56<br>57                                                            | Systematic review<br>Expert opinion                                | NA<br>NA                                                            |
| 6B             | 57<br>59, 60                                                        | Expert opinion<br>Case series                                      | <br>111, 94                                                         |
| 7A             | 61                                                                  | Systematic review                                                  | NA                                                                  |
| 7B             | 61<br>64<br>65, 66                                                  | Systematic review<br>Expert opinion<br>Case series                 | NA<br>NA<br>12, 589                                                 |
| 8              | 69, 77<br>70<br>74, 75                                              | Expert opinion<br>Case series<br>Case control                      | <br>2,500<br>527, 4,204                                             |
| 9              | 88, 89, 90, 91, 92, 93, 94, 95<br>96, 97                            | Case series<br>Case control                                        | 52, 16, 272, 92, 127, 133, 85, 16<br>56, 108                        |
| 10             | 86, 98, 101, 106, 107<br>80, 99, 102, 104, 105<br>100, 103          | Expert opinion<br>Case series<br>Case control                      | NA<br>193, 227, 81, 1019, 65<br>45, 75                              |
| 11             | 107                                                                 | Expert opinion                                                     | NA                                                                  |
| 12A            | 109, 111, 112, 113, 114, 118, 119<br>120<br>110, 116, 117<br>121    | Case series<br>Case control<br>Systematic review<br>Expert opinion | 252, 516, 25, 240, 52, 142, 76<br>189<br>NA<br>NA                   |
| 12B            | 111, 123, 124, 126, 147, 148, 156<br>127                            | Case series<br>Case control                                        | 516, 595, 444, 156, 48, 263, 107<br>52                              |
| 12C            | 128, 131, 132, 133, 134<br>130<br>140                               | Case series<br>Case control<br>Systematic review                   | 38, 270, 62, 206, 27<br>416<br>NA                                   |
| 13A            | 164<br>165, 166, 181                                                | Expert opinion<br>Case series                                      | 81<br>128, 200, 520                                                 |
| 13B            | 135, 167–172, 174–180                                               | Case series                                                        | 43, 26, 226, 114, 112, 104, 15, 190, 457, 118, 124, 81, 67          |
| 13C            | 163, 173                                                            | Case series                                                        | 79, 167                                                             |
| 13D            | 182, 183                                                            | Meta-analysis                                                      | 1,180, 399                                                          |
| 14A            | 185, 186, 187, 188                                                  | Case series                                                        | 83, 100, 48, 247                                                    |
| 14B            | 185, 191, 192, 193<br>190                                           | Case series<br>Expert opinion                                      | 83, 272, 846 (196), 20<br>NA                                        |
| 15A            | 194, 195, 196, 197                                                  | Case series                                                        | 68, 24, 212, 98                                                     |
| 15B            | 166, 194, 196, 198, 204                                             | Case series                                                        | 92, 212, 31, 200, 96                                                |
| 16A            | 230, 231, 232, 237, 238, 239<br>222, 223, 224, 225, 234, 236<br>233 | Case control<br>Case series<br>Expert opinion                      | 28, 14, 52, 52, 34, 20<br>75, 267, 467, 139, 48, 141<br>NA          |
| 16B            | 240<br>236                                                          | Case control<br>Case series                                        | 115<br>141                                                          |
| 17A            | 241, 243<br>242                                                     | Case series<br>Expert opinion                                      | 158426, 653<br>NA                                                   |

(Continued to the next page)

**Clinical and Experimental Otorhinolaryngology**

Supplementary Table 2. Continued

| Recommendation | Key reference                                                                                                  | Study design                                                                                               | No. of patients                                                                                                 |
|----------------|----------------------------------------------------------------------------------------------------------------|------------------------------------------------------------------------------------------------------------|-----------------------------------------------------------------------------------------------------------------|
| 17B            | 245, 246, 247, 248, 249, 251, 252<br>250                                                                       | Case series<br>Expert opinion                                                                              | 38, 277, 76, 60, 32, 69, 253<br>NA                                                                              |
| 18             | 188                                                                                                            | Case series                                                                                                | 247                                                                                                             |
| 19A            | 263, 264, 265, 242                                                                                             | Case series                                                                                                | 97, 301, 193, 653                                                                                               |
| 19B            | 274, 275, 207                                                                                                  | Case series                                                                                                | 67, 202, 127                                                                                                    |
| 19C            | 212                                                                                                            | RCT                                                                                                        | 132                                                                                                             |
| 20             | 285, 290<br>283, 284, 286, 287, 288, 289, 291, 292,<br>293, 294, 295, 296<br>282<br>297                        | Systematic review<br>Case series<br>Expert opinion<br>Case control                                         | NA<br>377, 310, 92, 293, 268, 246, 207, 106, 100, 136, 156, 30<br>NA<br>155                                     |
| 21A            | 298<br>299                                                                                                     | Expert opinion<br>RCT                                                                                      | NA<br>151                                                                                                       |
| 21B            | 300, 303                                                                                                       | RCT                                                                                                        | 459, 410                                                                                                        |
| 21C            | 301<br>302                                                                                                     | RCT<br>Expert opinion                                                                                      | 167<br>NA                                                                                                       |
| 22A            | 304, 321, 322, 323, 324, 325, 326, 327, 328<br>306<br>310                                                      | Case series<br>Expert opinion<br>Systematic review                                                         | 55, 32, 165, 1, 13, 3, 6, 8, 9<br>NA<br>NA                                                                      |
| 22B            | 308, 309, 316, 320<br>317, 318, 319                                                                            | Case series<br>Expert opinion                                                                              | 9, 120, 148, 608<br>NA                                                                                          |
| 23             | 333, 337, 339, 340, 342, 343, 344, 345,<br>346, 347<br>338<br>329, 330, 331, 332, 334, 335, 336, 341           | Case series<br>Randomized controlled<br>Expert opinion                                                     | 20, 40, 20, 79, 45, 45, 30, 63, 60, 90<br>332<br>NA                                                             |
| 24A            | 357<br>354, 356<br>349, 353, 358, 359, 361, 362<br>348, 350, 351, 352, 360                                     | Case control<br>Case series<br>Cohort study<br>Expert opinion                                              | 34<br>177, 52<br>60, 109, 157, 278, 30, 17<br>NA                                                                |
| 24B            | 364<br>365<br>366, 368<br>363<br>367                                                                           | Case series<br>Case control<br>Cohort study<br>Expert opinion<br>RCT                                       | 10<br>156<br>139, 224<br>NA<br>52                                                                               |
| 25             | 369, 370, 372, 373, 375, 377, 378, 380<br>371, 376, 379, 387<br>374, 381, 382<br>384, 385                      | Cohort study<br>Expert opinion<br>Case control<br>Systematic review                                        | 148, 47574, 89, 232, 115, 26, 190, 1127<br>NA<br>202540, 202<br>over 20,000, over 15,000                        |
| 26             | 393<br>388, 389, 391, 392, 395, 397, 398, 399<br>394<br>402, 407<br>390, 396, 403<br>404<br>400, 401, 405, 406 | Case control<br>Case series<br>Cohort study<br>Expert opinion<br>Meta-analysis<br>RCT<br>Systematic review | 1,408<br>211, 95, 178, 5461, 2924, 34, 30, 74<br>5838<br>NA, NA<br>3300, 1572, 1362<br>563<br>NA, NA, 1403, 145 |
| 27A            | 410, 411, 416<br>413, 414<br>409, 412, 415<br>417                                                              | Systematic review<br>Expert opinion<br>Case series<br>Cohort study                                         | NA<br>NA<br>327, 603, 661<br>854                                                                                |
| 27B            | 419<br>420                                                                                                     | Case series<br>Case control                                                                                | NA<br>155                                                                                                       |
| 28A            | 423, 437, 439<br>438                                                                                           | Case series<br>Cohort study                                                                                | 130, 181, 190<br>16                                                                                             |

(Continued to the next page)

Supplementary Table 2. Continued

| Recommendation | Key reference                            | Study design                                  | No. of patients                   |
|----------------|------------------------------------------|-----------------------------------------------|-----------------------------------|
| 28B            | 432                                      | Case series                                   | 66                                |
| 28C            | 433, 436, 440, 441<br>434, 435           | Case series<br>Systematic review              | 35, 42, 127, 56<br>NA             |
| 28D            | 424<br>425, 426                          | Cohort study<br>Case control                  | 428<br>556, 26                    |
| 28E            | 428, 429<br>427, 430                     | Case series<br>Cohort study                   | 152, 18<br>127, 45                |
| 29A            | 448, 449, 450, 451, 453, 294             | Case series                                   | 264, 182, 198, 261, 43, 136       |
| 29B            | 452, 454                                 | Case series                                   | 75, 147                           |
| 30A            | 461, 464, 465, 467, 468, 469, 470<br>466 | Case series<br>Expert opinion                 | 22, 39, 75, 29, 21, 43, 105<br>NA |
| 30B            | 481, 482, 483, 484, 485                  | Case series                                   | 40, 18, 36, 53, 34                |
| 30C            | 471, 472, 474, 475<br>407, 473<br>476    | Case series<br>Expert opinion<br>Case control | 21, 26, 20, 12<br>NA<br>42        |
| 30D            | 492, 493, 495, 496, 497<br>494           | Case control<br>Case series                   | 73, 230, 359, 31, 37<br>33        |
| 31A            | 478, 479, 480<br>499, 500, 501           | Expert opinion<br>Case series                 | NA<br>68, 93, 87                  |
| 31B            | 504                                      | Case series                                   | 34                                |
| 31C            | 503, 504, 505, 506, 507, 508<br>509      | Case series<br>Systematic review              | 42, 34, 71, 110, 45, 51<br>NA     |
| 32             | 514, 516<br>515, 523                     | Case series<br>Expert opinion                 | 11, 57<br>NA                      |

RCT, randomized controlled trial; NA, not available.
